# Supplementary material
Source: publisher figshare collection journal article supplement (https://future-science-group.figshare.com/ndownloader/files/35167441)
Supplement: Supplementary file 1 [file 35167441]

**Supplementary Table 1. MS-PCR *Alu* primer details**

| **Gene** | **Primer Type** | | | **Sequence (5’–3’)** | | **bp** |
| --- | --- | --- | --- | --- | --- | --- |
| *Alu* | M | F | CGGATTATTTGAGGTTAGGAGTTC | | 203 | |
| R | CCAAACTAAAATACAATAACGCGAT | |
| U | F | GTGGATTATTTGAGGTTAGGAGTTT | | 204 | |
| R | CCAAACTAAAATACAATAACACAAT | |

M- Methylation specific primer, U- Unmethylation specific prier, F- Forward primer, R- Reverse primer, bp- Base pair in length
